# Supplementary material for: Xylitol enhances synthesis of propionate in the colon via cross-feeding of gut microbiota
Source: PubMed Central journal article supplement (PMC7977168; doi:10.1186/s40168-021-01029-6), 2021-03-18
Supplement: 40168_2021_1029_MOESM7_ESM.pdf [file 40168_2021_1029_MOESM7_ESM.pdf]

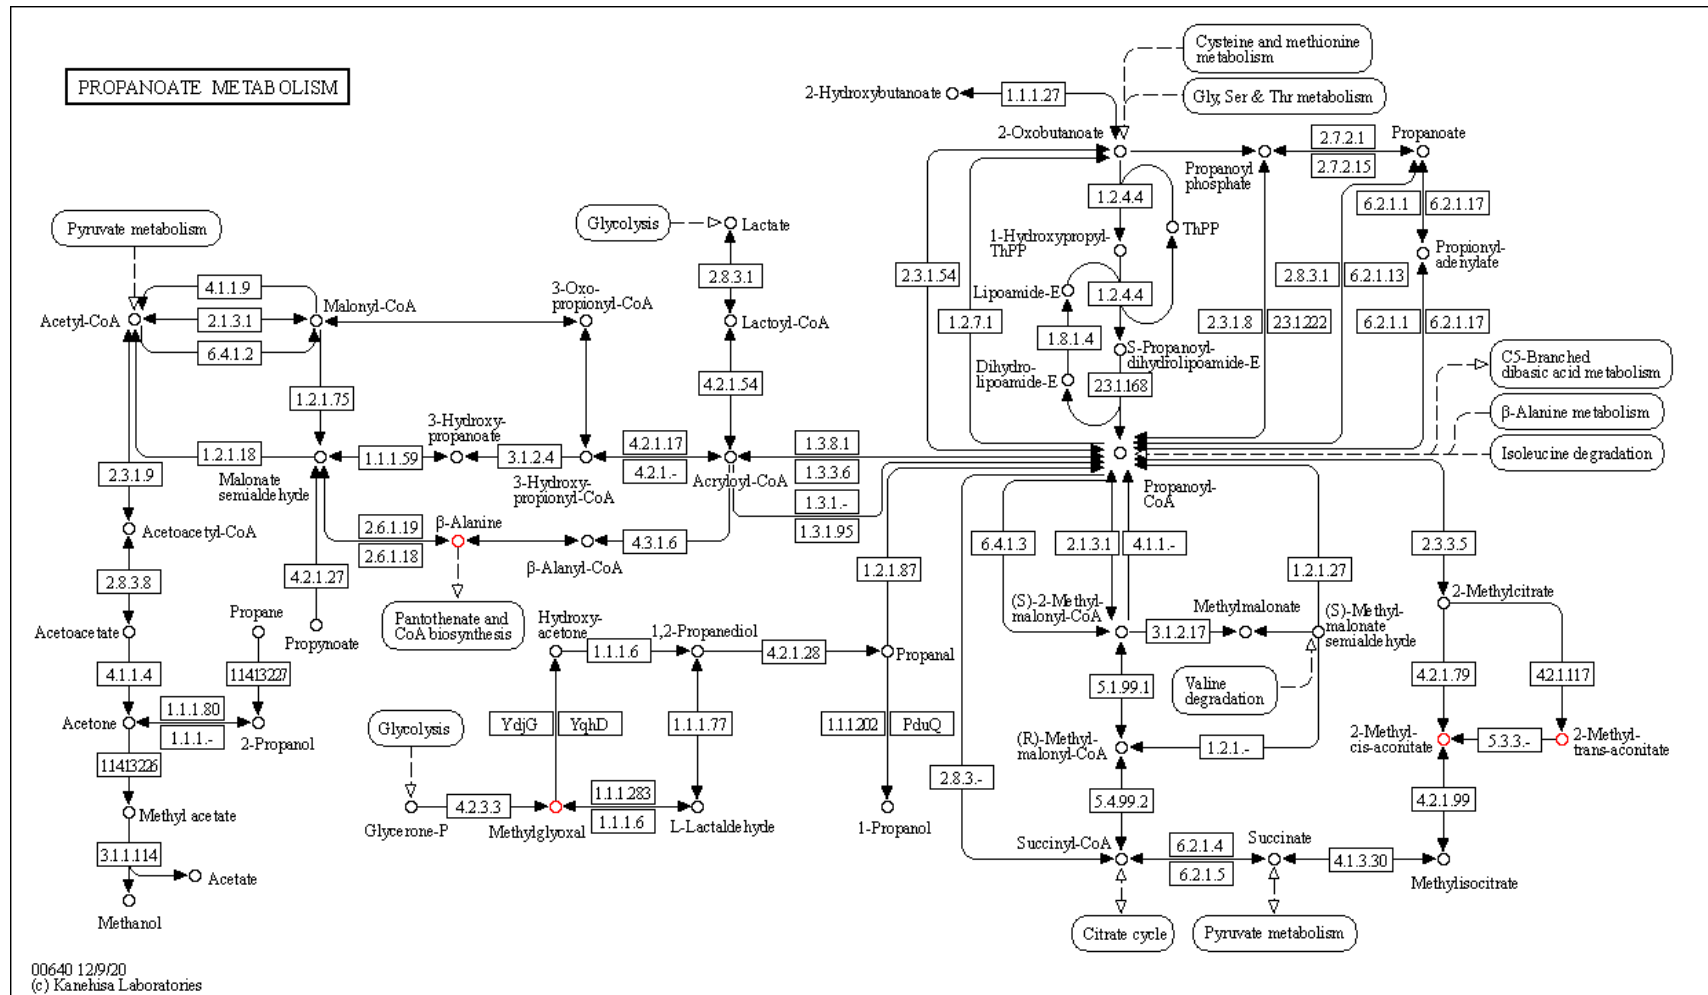

**Figure S6** Effects of xylitol on propanoate metabolites (Red-up regulate, Blue-down regulate).
